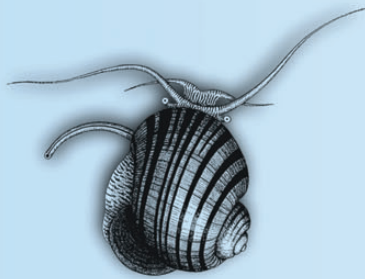

## Behind the mask: cryptic genetic diversity of *Mytilus galloprovincialis* along southern European and northern African shores

Carla R. Lourenço<sup>1</sup>, Katy R. Nicastro<sup>1</sup>, Ester A. Serrão<sup>1</sup>, Rita Castilho<sup>1</sup> and Gerardo I. Zardi<sup>2</sup>

<sup>1</sup>CCMAR, University of Algarve, Campus de Gambelas, Faro 8005-139, Portugal; and

<sup>2</sup>Department of Zoology and Entomology, Rhodes University, Grahamstown, South Africa

Correspondence: C. R. Lourenço; e-mail: carla.rodrigues.lourenco@gmail.com

(Received 4 July 2014; accepted 18 December 2014)

### ABSTRACT

Morphological uniformity in geographically widespread species may cause genetically distinct entities to pass unnoticed if they can only be detected by molecular approaches. The importance of uncovering such cryptic diversity is prompted by the need to understand the putative adaptive potential of populations along species ranges and to manage biodiversity conservation efforts. In this study, we aim to assess cryptic intraspecific genetic diversity and taxonomic status of the widely distributed intertidal mussel *Mytilus galloprovincialis*, along Atlantic southwestern (SW) Iberian, Atlantic northwestern (NW) Moroccan and Mediterranean Tunisian shores. By using mitochondrial (16S restriction-fragment length polymorphism) and nuclear (polyphenolic adhesive protein gene, Glu-5') markers, we discovered a more complex taxonomic diversity of *M. galloprovincialis* than previously known. Both Atlantic and Mediterranean haplogroups of *M. galloprovincialis* were detected along Atlantic SW Iberian shores along with *M. galloprovincialis/edulis* hybrids (92.2% Atlantic, 3.9% Mediterranean and 3.9% hybrids). In contrast, NW Moroccan populations consisted solely of Atlantic *M. galloprovincialis*. The Mediterranean populations did not include *M. galloprovincialis/edulis* hybrids, but both Atlantic (58%) and Mediterranean (42%) lineages were detected. Divergent selection between coastlines and/or indirect larval dispersal by human activities may be the drivers of this geographically structured genetic diversity.

### INTRODUCTION

Phenotypic uniformity can conceal intraspecific genetic diversity or even cryptic species (Bickford *et al.*, 2007; Geller, Darling & Carlton, 2010). Surprisingly, cryptic genetic diversity occurs not only in poorly studied taxa, but also in widely studied species that may include several distinct genetic entities (e.g. Lee & Foighil, 2004; Kadarusman *et al.*, 2012) or even novel species (e.g. Zardi *et al.*, 2011a,b). This undetected diversity leads to widespread underestimation of biodiversity. The assessment of the genetic dimension of biodiversity allows the identification of evolutionarily significant units and an understanding of species' adaptive potential (e.g. Gibson & Dworkin, 2004; Paaby & Rockman, 2014). Elucidation of cryptic complexes is particularly relevant to a functional definition of management and conservation efforts (Bickford *et al.*, 2007). When cryptic genetic diversity is revealed, complex distributional patterns of species and/or cryptic clades often emerge (e.g. Bierne *et al.*, 2002; Lee & Foighil, 2004; Johnson, Warén & Vrijenhoek, 2008; Kadarusman *et al.*, 2012). Moreover, in contact zones, hybrid populations may develop, characterized by offspring of mixed ancestry (Väinölä, 1991; Bierne *et al.*, 2003; Hilbish *et al.*, 2012).

Blue mussels of the genus *Mytilus* are dominant components of temperate marine rocky shores throughout the northern and southern hemispheres (Hilbish *et al.*, 2000). Genetic analyses have

revealed three closely related species: *M. edulis* (Linnaeus, 1758), *M. trossulus* (Gould, 1850) and *M. galloprovincialis* (Lamarck, 1819) (Koehn, 1991; McDonald, Seed & Koehn, 1991; Plazzi & Passamonti, 2010; Plazzi *et al.*, 2011). *Mytilus trossulus* is a boreal species distributed in the northeastern and northwestern (NW) Pacific, NW Atlantic, North Sea, Baltic Sea, White Sea and northern Norway and Barents Sea (e.g. McDonald *et al.*, 1991; Väinölä & Strelkov, 2011; Śmietanka *et al.*, 2013). *Mytilus edulis* is a cold-temperate species found from the White Sea through Iceland and the British Isles to southern France (Edwards & Skibinski, 1987; Sanjuan, Zapata & Alvarez, 1994 and references therein), reaching its southernmost European limit in the Bay of Biscay (Hilbish *et al.*, 2012). The warm-temperate *M. galloprovincialis* evolved in the Mediterranean and later expanded along Atlantic shores as far as the British Isles and North Africa (Gosling, 1992). This widespread geographical distribution comprises distinct genetic entities (Hilbish *et al.*, 2000): a North Atlantic haplogroup that includes *M. edulis* and a Mediterranean haplogroup.

Hybridization occurs between sympatric *Mytilus* species or genetic entities (e.g. Hilbish *et al.*, 2012); several hybrid zones have been reported between *M. edulis* and *M. trossulus* in the Baltic Sea (Stuckas *et al.*, 2009) and North America (Toro, Thompson & Innes, 2002). Furthermore, *M. galloprovincialis* and *M. edulis* have partially overlapping distributions along the Bay

of Biscay (e.g. Hilbish *et al.*, 2012; Gosset & Bierne, 2013), south-western (SW) England (Edwards & Skibinski, 1987) and Ireland (Gosling, Doherty & Howley, 2008), creating a mosaic structure where pure genotypes of both species alternate with hybrids.

Within *M. galloprovincialis*, an additional hybrid contact zone has been reported along the European side of the Almeria-Oran front (AOF; stretching from Almeria on the Spanish coast to Oran on the Algerian coast; Quesada, Zapata & Alvarez, 1995c). This oceanographic front separates Atlantic from Mediterranean waters, driven by major current eddies (Tintore *et al.*, 1988). This hybrid zone separates two distinct lineages: an Atlantic lineage, occurring from northern Spain around Portugal to southeastern Spain (Almeria), and a Mediterranean lineage, from Alicante into the Mediterranean. The stretch of coast between Almeria and Alicante corresponds to a discontinuity in mussel distribution, possibly being unsuitable for mussels due to unfavourable environmental conditions (Quesada *et al.*, 1995c).

Through interoceanic dispersion, *M. galloprovincialis* naturally invaded southern hemisphere shorelines between 0.84 Ma (Gérard *et al.*, 2008) and 1.2 Ma (Hilbish *et al.*, 2000), evolving into a genetically distinguishable southern lineage (Westfall, Wimberger & Gardner, 2010). In the southern hemisphere, the native range of *M. galloprovincialis* includes Australia, New Zealand and Chile (Hilbish *et al.*, 2000; Gérard *et al.*, 2008; Westfall & Gardner, 2010, 2013) and it has been accidentally introduced to South Africa (Grant & Cherry, 1985).

Notably, recent studies have shown extensive invasion of northern hemisphere *M. galloprovincialis* in Australia, Chile and New Zealand; in fact 10–80% of *M. galloprovincialis* sampled in the southern hemisphere were identified as of northern hemisphere origin (Westfall & Gardner, 2010). Additionally, ongoing hybridization has been reported from the southern hemisphere where northern and southern lineages of *M. galloprovincialis* coexist (Westfall & Gardner, 2013).

In contrast to southern hemisphere and northern European shores, the taxonomic status of *Mytilus* along Atlantic SW Iberian and NW Moroccan coastlines remains relatively unexplored (but see Quesada *et al.*, 1995c; Comesaña, Posada & Sanjuan, 1998; Daguin & Borsa, 1999; Daguin & Borsa, 2000; Fraïsse *et al.*, 2014; Ouagajjou & Presa, 2015). The present study addresses genetic diversity of native *Mytilus* and assesses possible inter-hemispheric invasion along southern European and northern African shores, using a combination of diagnostic species and lineage-specific nuclear and mitochondrial markers for the genus *Mytilus*. Specifically, a mitochondrial DNA 16S restriction-fragment length polymorphism (RFLP) assay is here employed to distinguish: (1) *M. trossulus*; (2) invasive southern hemisphere *M. galloprovincialis* haplogroup; (3) Mediterranean, northern hemisphere *M. galloprovincialis* haplogroup and (4)

North Atlantic northern hemisphere *M. edulis*/*M. galloprovincialis* haplogroup (Rawson & Hilbish, 1995; Hilbish *et al.*, 2000; Westfall *et al.*, 2010). The 16S data cannot distinguish between *M. edulis* and *M. galloprovincialis*, so we also used the size of polymerase chain reaction (PCR) amplified fragments of the nuclear-DNA Glu-5' gene to characterize these species (Inoue *et al.*, 1995). Used in conjunction, these markers allow ready taxonomic identification among the three species within the *M. edulis* complex.

## MATERIAL AND METHODS

### Sampling and DNA extraction

A total of 249 samples of *Mytilus galloprovincialis* were collected from 11 locations along the SW Iberian, NW Moroccan and Mediterranean Tunisian intertidal shores between November 2010 and April 2012 (Table 1; Fig. 1). Mantle tissue (20–30 mg) was dissected from each individual, preserved in 96% ethanol and stored at –20 °C. To avoid the complication of doubly-uniparental inheritance (Skibinski, Gallagher & Beynon, 1994; Zouros *et al.*, 1994) in gonadal tissue, only female mtDNA was targeted in our study by selecting muscle tissue. Total genomic DNA extraction was performed using a standard Proteinase K protocol (adapted from Sambrook, Fritsch & Maniatis, 1989).

### DNA markers: 16S RFLP

Universal primers amplifying portions of the 16S rRNA gene (16SAR 5'-CGCCTGTTTAACAAAAACAT-3' and 16SBR 5'-CCGGTTTGAAGTCAATCAGTACCGT-3', Palumbi, 1996) were used for PCR. PCR was performed in 25 µl containing 1–10 ng of total DNA, 0.2 µM of each primer, 0.2 mM of each dNTP, 1 mM of MgCl<sub>2</sub>, 1× GoTaq Flexi Buffer (Promega, USA) and 1 U GoTaq DNA Polymerase (Promega, USA). Amplification used an initial denaturation during 5 min at 94 °C followed by 35 cycles of denaturation at 94 °C for 30 s, annealing at 46 °C for 30 s, extension at 72 °C for 30 s and a final extension at 72 °C for 5 min. PCR products were sequenced directly in an automated DNA sequencer (ABI PRISM 3130, Applied Biosystems) using PCR primers and the BigDye Terminators v. 3.1 Cycle Sequencing Kit (Applied Biosystems, Foster-City, CA, USA).

The 16S rRNA sequences were virtually digested using the web-based tool Restriction Digest available at [http://www.bioinformatics.org/sms2/rest\\_digest.html](http://www.bioinformatics.org/sms2/rest_digest.html) (accessed 20 November 2014). The virtual digestion using *EcoRV*, *NheI* and *SpeI* enzymes allows us to distinguish between *M. trossulus*, North Atlantic *M. edulis*/*M. galloprovincialis* haplogroup and northern Mediterranean and southern hemisphere *M. galloprovincialis* (Hilbish *et al.*, 2000; Westfall *et al.*, 2010). Published partial

**Table 1.** List of sampling locations in southwestern Iberia, Tunisia and northwestern Morocco with coordinates and sample size for each.

| Country  | Location        | Code | Coordinates                  | Sample size |
|----------|-----------------|------|------------------------------|-------------|
| Portugal | Sagres          | SG   | 37°00'23.69"N; 8°56'55.80"W  | 18          |
| Portugal | Vilamoura       | VL   | 37°04'05.50"N; 8°06'42.64"W  | 24          |
| Portugal | Tavira          | TV   | 37°06'41.06"N; 7°36'57.99"W  | 25          |
| Spain    | Punta del Moral | PM   | 37°10'57.76"N; 7°19'46.83"W  | 25          |
| Spain    | Atlanterra      | AT   | 36°05'24.78"N; 5°48'43.02"W  | 23          |
| Tunisia  | Bizerte         | BZ   | 37°15'10.41"N; 9°56'41.15"E  | 22          |
| Tunisia  | Kourbous        | KR   | 36°49'29.04"N; 10°33'59.97"E | 21          |
| Morocco  | Rabat           | RB   | 34°1'57.26"N; 6°50'27.96"W   | 23          |
| Morocco  | Casablanca      | CB   | 33°39'7.22"N; 7°29'3.11"W    | 22          |
| Morocco  | Sidi Bouzid     | SB   | 33°13'6.11"N; 8°34'23.19"W   | 25          |
| Morocco  | El Beddouza     | EB   | 32°32'42.33"N; 9°16'55.34"W  | 21          |

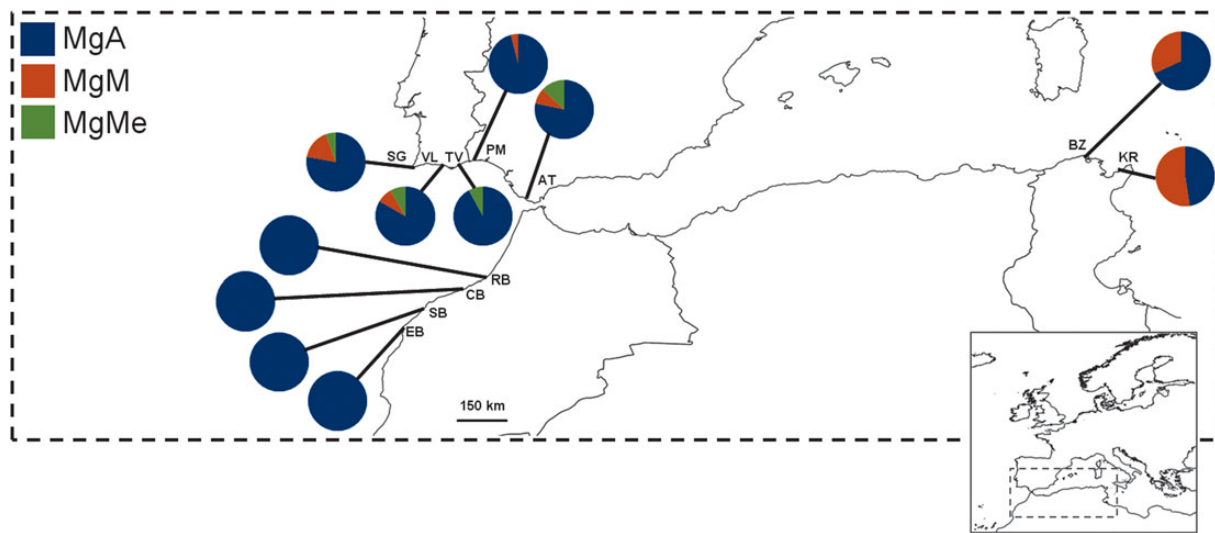

**Figure 1.** Geographic location of southwestern Iberian, northwestern Moroccan and Mediterranean Tunisian sampling sites and results of combined 16S and Me 15/16 identification. Abbreviations: MgA, Atlantic *Mytilus galloprovincialis*; MgM, Mediterranean *M. galloprovincialis*; MgMe, hybrids of *M. galloprovincialis* and *M. edulis*. Location codes are according to Table 1.

sequences representing the different haplogroups were retrieved from GenBank (accession numbers: GQ455380–GQ455405). Following an alignment and trimming of GenBank sequences and the ones from this study with subsequent triple (virtual) digestion, *M. trossulus* is expected to display three bands (band sizes: 370, 85 and 82 bp), North Atlantic *M. edulis*/*M. galloprovincialis* haplogroup four bands (band sizes: 342, 85, 82 and 28 bp), northern Mediterranean *M. galloprovincialis* two bands (band sizes: 342 and 195 bp) and southern *M. galloprovincialis* three bands (band sizes: 342, 167 and 28 bp) (from Westfall *et al.*, 2010; Table 2). Individuals were classified according to band sizes and the proportion of allocation to each haplogroup was quantified for each sampling location.

To confirm the identification of each specimen as determined by band sizes, a phylogenetic tree was built with sequences retrieved from GenBank (for southern *M. galloprovincialis* sequences with GQ455381–GQ455383, GQ455385–GQ455389, GQ455391, GQ455394–GQ455395; for northern Mediterranean *M. galloprovincialis* sequences with GQ455380, GQ455384, GQ455398; for North Atlantic *M. edulis*/*M. galloprovincialis* sequences with GQ455392–GQ455393, GQ455396–GQ455397, GQ455399, GQ455405 and for *M. trossulus* sequences with GQ455400, GQ455402, GQ455404). These and our sequences were combined in one dataset and haplotypes were estimated through COLLAPSE v. 1.2 (Posada, 2004). The Akaike Information Criterion implemented in jModelTest v. 0.1.1 (Posada, 2008) selected TnR + G as the best-fit model to be used in MrBayes v. 3.2 (Ronquist *et al.*, 2012). The phylogenetic tree was built using Bayesian inference (BI) performed with MrBayes v. 3.2, running for 500,000 generations (three simultaneous Monte Carlo Markov chains; sample frequency 500). Two independent runs were performed. Burn-in was set to the first 25% of generations. The robustness of the inferred Bayesian trees was determined using Bayesian posterior probabilities (as obtained from majority-rule consensus trees of the post burn-in trees).

Partial sequences representing the 249 individuals used in this study were deposited in GenBank (accession numbers: KM056770–KM056975 and KP202882–KP202924).

#### DNA markers: Glu-5'

Primers Me 15/16 (Me15, 5'-CCAGTATACAAACCTGTGAA GA-3' and Me16, 5'-TGTTGTCTTAATAGGTTTGTAAAGA)

**Table 2.** Identification of *Mytilus* species and genetic haplogroups based on number and size of bands for both 16S RFLP and Glu-5'.

| 16S RFLP   |                |             |             | Glu-5'     |            |            |
|------------|----------------|-------------|-------------|------------|------------|------------|
| Mt<br>(bp) | Me/MgA<br>(bp) | MgM<br>(bp) | MgS<br>(bp) | Mg<br>(bp) | Me<br>(bp) | Mt<br>(bp) |
| 370        | 342            | 342         | 342         | 126        | 180        | 168        |
| 85         | 85             | 195         | 167         |            |            |            |
| 82         | 82             |             | 28          |            |            |            |
|            | 28             |             |             |            |            |            |

Abbreviations: Mt, *M. trossulus*; Me/MgA, North Atlantic *M. edulis*/*M. galloprovincialis* haplogroup; MgM, Mediterranean *M. galloprovincialis*; MgS, southern hemisphere *M. galloprovincialis*; Mg, *M. galloprovincialis*; Me, *M. edulis*; Mt, *M. trossulus*.

targeted the nuclear polyphenolic adhesive protein gene (Glu-5', Inoue *et al.*, 1995). Amplification was performed in a 10 µl reaction volume containing 1–10 ng of total DNA, 0.25 µM of each primer, 0.05 mM of each dNTP, 1× GoTaq Flexi Buffer (Promega, USA), 3 mM of MgCl<sub>2</sub> and 1 U GoTaq DNA Polymerase (Promega, USA). Amplified fragments were obtained under the following PCR conditions: initial denaturation at 94 °C for 4 min followed by 30 cycles of denaturation at 94 °C for 30 s, annealing at 56 °C for 30 s, extension at 72 °C for 90 s and a final extension at 72 °C for 4 min. PCR products stained with GelRed were run and scored on 2% agarose gel.

The size of the Me 15/16 PCR fragments is species-specific and used to distinguish between *M. trossulus*, *M. edulis* and *M. galloprovincialis* (Inoue *et al.*, 1995). The expected fragment size for *M. trossulus* is 168 bp, for *M. edulis* is 180 bp and for *M. galloprovincialis* is 126 bp (Inoue *et al.*, 1995; Table 2).

## RESULTS

#### 16S RFLP

Virtual digestion revealed two distinct haplogroups, Atlantic *Mytilus edulis*/*M. galloprovincialis* (northern hemisphere; North Atlantic haplogroup) and northern Mediterranean *M. galloprovincialis* (northern



hemisphere, hereafter referred to as Mediterranean haplogroup according to Westfall & Gardner, 2013), while no *M. trossulus* individuals were recorded. BI analyses confirmed virtual digestion results (Supplementary material, Fig. S1). However, one individual showed the typical number and size of southern *M. galloprovincialis* fragments, while it clustered together with *M. edulis*/*M. galloprovincialis* haplogroup in the phylogenetic tree (individual SB02 in Supplementary material, Fig. S1). Haplogroup frequency revealed that the Atlantic *M. edulis*/*M. galloprovincialis* haplogroup represented 89.6% of all individuals (223 out of 249) while the Mediterranean *M. galloprovincialis* haplogroup represented 10.4% (26 out of 249). The Mediterranean *M. galloprovincialis* haplogroup was found only at four Iberian and two Tunisian sites and not at Moroccan locations, whereas the Atlantic *M. edulis*/*M. galloprovincialis* haplogroup was widespread across Iberian, Moroccan and Tunisian locations (Fig. 1). The Mediterranean *M. galloprovincialis* haplogroup occurred at much higher frequency inside the Mediterranean (41.9%) than in Atlantic locations (3.9%). The SW Iberian coast was comprised of 93% Atlantic *M. edulis*/*M. galloprovincialis* and 7% of Mediterranean *M. galloprovincialis*. The NW Moroccan coast was 100% Atlantic *M. galloprovincialis*, while Tunisia was 58% Atlantic and 42% Mediterranean *M. galloprovincialis*.

#### Glu-5'

The Me 15/16 PCR assay targeting the Glu-5' gene did not detect any *M. edulis* or *M. trossulus* individuals (i.e. no band sizes typical of these two species appeared). Because band sizes were 126 bp, 241 individuals previously classified (by DNA 16S RFLP assay) as Atlantic *M. edulis*/*M. galloprovincialis* or Mediterranean *M. galloprovincialis* were assigned to *M. galloprovincialis*. Additionally, 8 individuals out of 249 (3.2%) dispersed among the SW Iberian locations (Fig. 1) and classified as *M. edulis*/*M. galloprovincialis* haplogroup displayed two fragments (126 and 180 bp), typically found in hybrid forms of *M. galloprovincialis* and *M. edulis* (Inoue et al., 1995; hereafter referred to as *M. galloprovincialis*/*M. edulis* hybrids).

### DISCUSSION

Our results show extensive cryptic taxonomic diversity in the genus *Mytilus* along Atlantic SW Iberian, NW Moroccan and Mediterranean Tunisian shores. Recent studies have described a widespread invasion of northern hemisphere *M. galloprovincialis* and interspecific hybrids (of *M. edulis* and *M. galloprovincialis*) into the southern hemisphere (Westfall & Gardner, 2010; Westfall & Gardner, 2013). Although our study did not reveal invasive southern hemisphere *Mytilus* in the northern hemisphere, the combined information provided by the mitochondrial DNA 16S RFLP assay and nuclear-DNA Glu-5' highlights a more complex distributional pattern of lineages and hybrids than previously shown.

Hybrids of *M. galloprovincialis*/*M. edulis* are well described from northern Spain, France (Coustau, Renaud & Delay, 1991; Bierne et al., 2002; Hilbish et al., 2012) SW England (Edwards & Skibinski, 1987) and Ireland (Gosling et al., 2008), but have rarely been reported from Atlantic southern European shores (Comesaña et al., 1998; Kijewski et al., 2011). Here, we show that these hybrids are broadly distributed at relatively low frequency in SW Iberia. Interestingly, hybrids were not detected at any of the NW Moroccan or Mediterranean sites. Divergent environmental conditions may be the cause of such sharp geographical structure.

Sea surface temperature (SST) is recognized as a major determinant of geographic distributions of many marine species over large (latitudinal) geographic scales (Parmesan, 2006; Jones,

Lima & Wetthey, 2010). SST clines can define species' distributional limits and shifts, either directly acting on organisms' thermal tolerance or indirectly by changing competition or predation dynamics (Southward, Hawkins & Burrows, 1995; Parmesan, 2006; Jones et al., 2010). Atlantic shores between the Iberian Peninsula and North Africa are characterized by a strong, persistent latitudinal gradient in SST (Lima et al., 2007; Nicastro et al., 2013). This environmental cline marks distributional boundaries of many cold- and warm-water species (e.g. Lima et al., 2007) and could explain the lack of cold-temperate *M. edulis* hybrids along Moroccan shores. The role played by SST in latitudinally segregating distinct *Mytilus* entities is further supported by the absence of the pure, cold-water species *M. edulis* along our study area. The absence of *M. edulis* from southern Iberia was also reported by Fraïsse et al. (2014). Similarly, relatively warmer SST along Tunisian shores (Goddard Earth Sciences, Data and Information Services Center; <http://disc.sci.gsfc.nasa.gov>, accessed 22 November 2014) could exclude *M. edulis* and its hybrids from Mediterranean waters.

Wave action is one of the major stresses affecting intertidal communities (e.g. Zardi et al., 2008). The capability of a mussel to resist waves and avoid being dislodged depends primarily on its byssal attachment strength. While *M. galloprovincialis* is more strongly attached to the substratum than *M. edulis* and thus less easily dislodged by waves (Schneider et al., 2005), intermediate attachment strength values have been found in hybrids of the two species (Willis & Skibinski, 1992). These differences in attachment strength indicate that wave action is a potential determinant of competitive interactions and ultimately habitat segregation (Schneider et al., 2005). However, it is unlikely that hydrodynamic stress is responsible for the exclusion of species or lineages at latitudinal scales; waves are more likely to affect species zonation at small (Zardi et al., 2006) and/or meso-scales (Nicastro et al., 2008), rather than at large geographic scales as in the patterns described in the present study.

In addition to the limited geographical distribution of *M. galloprovincialis*/*M. edulis* hybrids along our study area, individuals belonging to the Mediterranean *M. galloprovincialis* haplogroup were restricted to four SW Iberian and the two Mediterranean sites, and absent from Moroccan shores. The study area is characterized by several oceanographic currents with contrasting directionalities and intensities. The SW coast of the Iberian Peninsula, as well as the northwest Moroccan coastline, is mainly affected by the eastward-flowing Azores Current (Martins, 2002). The eastward branch of this current enters the Gulf of Cadiz and flows south, pushed by eddies and gyres occurring offshore in front of the southern coast of Portugal (Martins, 2002). The Canary Current transports the North Atlantic Central Water southwards, along the Atlantic western coast of Morocco (Knoll et al., 2002). All of these Atlantic oceanographic features are likely to promote larval dispersal, thus reducing between-region genetic structuring of broadcast-spawning invertebrates inhabiting these shores (e.g. Quinteiro, Rodríguez-Castro & Rey-Méndez, 2007; Lourenço, 2012).

The Strait of Gibraltar is the meeting point between Atlantic and Mediterranean waters. A flux of surface Atlantic waters enters the Mediterranean through the Strait of Gibraltar and circulates in two anticyclonic gyres: the west Alboran gyre and the east Alboran gyre (EAG) (Helguen et al., 2002). The eastern edge of the EAG flowing along the Algerian coast corresponds to the AOF. The AOF is a sharp hydrogeographical transition located at the easternmost boundary of the Alboran Sea; it is characterized by strong salinity and SST gradients coupled with strong currents, eddies and gyres separating Western Mediterranean and Atlantic waters (Tintore et al., 1988). The AOF is recognized as barrier to larval dispersal, causing several species to show clear genetic structuring (Borsa, Blanquer & Berrebi, 1997; Patarnello, Volckaert & Castilho, 2007). In

*M. galloprovincialis* a distinct genetic break at the AOF has been shown with a wide range of markers: mitochondrial DNA (Quesada, Beynon & Skibinski, 1995a; Sanjuan, Comesaña & De Carlos, 1996), nuclear DNA (mac-1: Daguin & Borsa, 1999; Daguin, Bonhomme & Borsa, 2001; microsatellites: Ouagajjou & Presa, 2015) and a combination of mitochondrial and nuclear markers (Śmietanka, Burzyński & Wenne, 2010; Kijewski et al., 2011). Much weaker (but still visible) divergence was detected with allozymes (locus ODH; Sanjuan et al., 1994; Quesada et al., 1995c) and microsatellites (Diz & Presa, 2008). It has been suggested that the AOF genetic structure is the result of secondary contact between an Atlantic and a Mediterranean lineage that occurred before the formation of the AOF (Quesada, Wenne & Skibinski, 1995b). In addition to present day hydrography and environmental features, the complex geological and climatic history of the Mediterranean might have contributed to the biogeographical separation between Atlantic and Mediterranean biota (Patarnello et al., 2007 and references therein). Over the last few million years, the Mediterranean Sea has been affected by several geological events; recurrent glaciations during the Pleistocene and dramatic drop of the sea level during the 'Messinian salinity crisis' influenced contemporary intra- and interspecific diversity within the Mediterranean and between the Mediterranean and the Atlantic Ocean. However, marker-specific genetic patterns, together with the widespread occurrence of Mediterranean and Atlantic *M. galloprovincialis* in Atlantic and Mediterranean waters reported in our study, suggest that, at the AOF, a semipermeable genetic barrier is acting together with oceanographic (e.g. currents) and environmental (e.g. SST) barriers (Galarza et al., 2009; Bierre et al., 2011 and references therein; Sá-Pinto et al., 2012). Although the divergence time of the Atlantic and Mediterranean lineages remains unknown, the complex geological history of the Mediterranean (e.g. Messinian salinity crisis, when the connection between Atlantic and Mediterranean waters was lost) might have shaped and separated these two lineages which then evolved in allopatry.

In the Anthropocene era (Frawley & McCalman, 2014) the effect of human activities on the redistribution of marine biota must be considered in addition to environmental divergent selection and changing climate. Ballast water has been recognized as a primary source of invasive species in coastal freshwater and marine ecosystems (Carlton, 1999). Ballast water can transport thousands of species per day throughout the world (exceeding 10,000 species; Carlton, 1999), which can be released in a completely different region, erasing the effects of any natural geographical barriers (Flagella, Soria & Buia, 2006; Gollasch et al., 2002). It has also been shown that hull fouling and seawater ballast tanks are major vectors for the spread of invasive organisms (Coutts, Moore & Hewitt, 2003; Hopkins & Forrest, 2008). There is evidence that the distribution of Mytilidae has been enhanced by both ballast-water transport and ship fouling (Wonham, 2004). Moreover, unmanaged vessel fouling and incorrect vessel cleaning procedures can contribute to the propagation of invasive species, by acting as suitable substratum or releasing individuals to new areas (Hopkins & Forrest, 2008; Cunha et al., 2014), thus affecting the ecological equilibrium of recipient communities. The southwest Iberian coast is an area known for intense shipping and it lies on the main route to northern regions from the Mediterranean (Flagella et al., 2006; Janeiro, Martins & Relvas, 2012). Maritime traffic has been increasing around the world as a response to human demands and the traffic inside Mediterranean is likely to continue increasing as well (Flagella et al., 2006). The predicted increase in shipping activities will presumably enhance invasive events as it has in the past decades (Ruiz et al., 1997; Flagella et al., 2006; Gollasch, 2006). In 2001, around 39,000 ship arrivals have been recorded for the international Italian harbours of Naples and Salerno

(Flagella et al., 2006), revealing an intense maritime traffic for just two single harbours. In particular, the connectivity of Mediterranean harbours, such as of these two Italian harbours, is more frequent with Iberia than with North Africa, thus increasing the opportunity for transportation of Mediterranean *M. galloprovincialis* specimens to southern Portugal and Spain rather than to Morocco (Flagella et al., 2006).

In conclusion, the combination of the species-specific nuclear Glu-5' and mitochondrial DNA 16S RFLP assay has identified novel and geographically structured distribution of *M. galloprovincialis* lineages and hybrids. The Atlantic lineage is widely spread over the study area and the Mediterranean lineage is dispersed along SW Iberian and Mediterranean shores, while hybrids of *M. galloprovincialis*/edulis are restricted to SW Iberian shores. We anticipate that the use of these markers to characterise Atlantic North European and Mediterranean mussel populations will be crucial to unveil further the complexity and geographic distribution of *M. galloprovincialis*.

The significance of our findings extends beyond theoretical interest. Because different genetic entities may display diverse ecophysiological attributes (e.g. Pfennig, Rice & Martin, 2007; Zardi et al., 2011a,b), the detection of intraspecific genetic variation and hybrid zones is of critical importance for a complete understanding of ongoing and future population dynamics.

In addition to individual biological attributes, habitat complexity and community composition of different *Mytilus* (species or hybrid) bed assemblages deserve to be investigated. Different mussel taxa can display distinct bioengineering properties (e.g. Nicastro et al., 2012) that can affect diversity and abundance associated with mussel aggregations (e.g. Cole, 2010).

## SUPPLEMENTARY MATERIAL

Supplementary material is available at *Journal of Molluscan Studies* online.

## ACKNOWLEDGEMENTS

We are grateful to R. Silva and R. Jacinto for help in the field and to A. Balau for assistance in the laboratory. We are also grateful to K. Westfall for helping with the RFLP assay identification. This research was supported by post-doctoral fellowships from Fundação para a Ciência e Tecnologia (FCT), Portugal (to G.I.Z.) and funded by project PTDC/BIA-BEC/103916/2008 from FCT (to G.I.Z.) and partially funded by the Bilateral Project (Acordo Portugal – Tunisia: 2010/2011).

## REFERENCES

- BICKFORD, D., LOHMAN, D.J., SODHI, N.S., NG, P.K., MEIER, R., WINKER, K., INGRAM, K.K. & DAS, I. 2007. Cryptic species as a window on diversity and conservation. *Trends in Ecology and Evolution*, **22**: 148–155.
- BIERNE, N., BORSA, P., DAGUIN, C., JOLLIVET, D., VIARD, F., BONHOMME, F. & DAVID, P. 2003. Introgression patterns in the mosaic hybrid zone between *Mytilus edulis* and *M. galloprovincialis*. *Molecular Ecology*, **12**: 447–461.
- BIERNE, N., DAVID, P., LANGLADE, A. & BONHOMME, F. 2002. Can habitat specialization maintain a mosaic hybrid zone in marine bivalves? *Marine Ecology Progress Series*, **245**: 157–170.
- BIERNE, N., WELCH, J., LOIRE, E., BONHOMME, F. & DAVID, P. 2011. The coupling hypothesis: why genome scans may fail to map local adaptation genes. *Molecular Ecology*, **20**: 2044–2072.
- BORSA, P., BLANQUER, A. & BERREBI, P. 1997. Genetic structure of the flounders *Platichthys flesus* and *P. stellatus* at different geographic scales. *Marine Biology*, **129**: 233–246.
- CARLTON, J.T. 1999. The scale and ecological consequences of biological invasions in the World's oceans. In: *Invasive species and*

- biodiversity management (O.T. Sandlund, P.J. Schei & A. Viken, eds), pp. 195–212. Kluwer Academic, Dordrecht, The Netherlands.
- COLE, V.J. 2010. Alteration of the configuration of bioengineers affects associated taxa. *Marine Ecology Progress Series*, **416**: 127–136.
- COMESAÑA, A.S., POSADA, D. & SANJUAN, A. 1998. *Mytilus galloprovincialis* Lmk. in northern Africa. *Journal of Experimental Marine Biology and Ecology*, **223**: 271–283.
- COUSTAU, C., RENAUD, F. & DELAY, B. 1991. Genetic characterization of the hybridization between *Mytilus edulis* and *M. galloprovincialis* on the Atlantic coast of France. *Marine Biology*, **111**: 87–93.
- COUTTS, A.D.M., MOORE, K.M. & HEWITT, C.L. 2003. Ships' sea-chests: an overlooked transfer mechanism for non-indigenous marine species? *Marine Pollution Bulletin*, **46**: 1504–1515.
- CUNHA, R.L., NICASTRO, K.R., COSTA, J., McQUAID, C.D., SERRÃO, E.A. & ZARDI, G.I. 2014. Wider sampling reveals a non-sister relationship for geographically contiguous lineages of a marine mussel. *Ecology and Evolution*, **4**: 2070–2081.
- DAGUIN, C., BONHOMME, F. & BORSA, P. 2001. The zone of sympatry and hybridization of *Mytilus edulis* and *M. galloprovincialis*, as described by intron length polymorphism at locus mac-1. *Heredity*, **86**: 342–354.
- DAGUIN, C. & BORSA, P. 1999. Genetic characterisation of *Mytilus galloprovincialis* Lmk. in North West Africa using nuclear DNA markers. *Journal of Experimental Marine Biology and Ecology*, **235**: 55–65.
- DAGUIN, C. & BORSA, P. 2000. Genetic relationships of *Mytilus galloprovincialis* Lmk. populations worldwide: evidence from nuclear-DNA markers. In: *Bivalve systematics and evolutions* (A. Crame, E.M. Harper & J.D. Taylor, eds), pp. 389–397. Geological Society of London Special Volume.
- DIZ, A.P. & PRESA, P. 2008. Regional patterns of microsatellite variation in *Mytilus galloprovincialis* from the Iberian Peninsula. *Marine Biology*, **154**: 277–286.
- EDWARDS, C.A. & SKIBINSKI, D.O.F. 1987. Genetic variation of mitochondrial DNA in mussel (*Mytilus edulis* and *M. galloprovincialis*) populations from South West England and South Wales. *Marine Biology*, **94**: 547–556.
- FLAGELLA, M.M., SORIA, A. & BUIA, M.C. 2006. Shipping traffic and introduction of non-indigenous organisms: study case in two Italian harbours. *Ocean & Coastal Management*, **49**: 947–960.
- FRAÏSSE, C., ROUX, C., WELCH, J. & BIERNE, N. 2014. Gene-flow in a mosaic hybrid zone: is local introgression adaptive? *Genetics*, **197**: 939–951.
- FRAWLEY, J. & McCALMAN, I. 2014. *Rethinking invasion ecologies from the environmental humanities*. Routledge, New York.
- GALARZA, J.A., CARRERAS-CARBONELL, J., MACPHERSON, E., PASCUAL, M., ROQUES, S., TURNER, G.F. & RICO, C. 2009. The influence of oceanographic fronts and early-life-history traits on connectivity among littoral fish species. *Proceedings of the National Academy of Sciences of the USA*, **106**: 1473–1478.
- GELLER, J.B., DARLING, J.A. & CARLTON, J.T. 2010. Genetic perspectives on marine biological invasions. *Annual Reviews in Marine Science*, **2**: 367–393.
- GÉRARD, K., BIERNE, N., BORSA, P., CHENUIL, A. & FERAL, J.P. 2008. Pleistocene separation of mitochondrial lineages of *Mytilus* spp. mussels from Northern and Southern Hemispheres and strong genetic differentiation among southern populations. *Molecular Phylogenetics and Evolution*, **49**: 84–91.
- GIBSON, G. & DWORKIN, I. 2004. Uncovering cryptic genetic variation. *Nature Reviews Genetics*, **5**: 681–690.
- GOLLASCH, S. 2006. Overview on introduced aquatic species in European navigational and adjacent waters. *Helgoland Marine Research*, **60**: 84–89.
- GOLLASCH, S., MacDONALD, E., BELSON, S., BOTNEN, H., CHRISTENSEN, J.T., HAMER, J.P., HOUVENAGHEL, G., JELMERT, A., LUCAS, I., MASSON, D., McCOLLIN, T., OLENIN, S., PERSSON, A., WALLENTINUS, I., WETSTEYN, L.P.M.J. & WITTLING, T. 2002. Life in ballast tanks. In: *Invasive aquatic species of Europe: distribution, impacts and management* (E. Leppakoski, S. Gollasch & S. Olenin, eds), pp. 217–231. Kluwer Academic, Dordrecht, The Netherlands.
- GOSLING, E. 1992. *The mussel Mytilus: ecology, physiology, genetics and culture*. Elsevier Science Publishers B. V., Amsterdam.
- GOSLING, E., DOHERTY, S. & HOWLEY, N. 2008. Genetic characterization of hybrid mussel (*Mytilus*) populations on Irish coasts. *Journal of the Marine Biological Association of the United Kingdom*, **88**: 341–346.
- GOSSET, C.C. & BIERNE, N. 2013. Differential introgression from a sister species explains high  $F_{ST}$  outlier loci within a mussel species. *Journal of Evolutionary Biology*, **26**: 14–26.
- GRANT, W.S. & CHERRY, M.I. 1985. *Mytilus galloprovincialis* Lmk. in Southern Africa. *Journal of Experimental Marine Biology and Ecology*, **90**: 179–191.
- HELGUEN, S.L., LE CORRE, P., MADEC, C. & MORIM, P. 2002. New and regenerated production in the Almeria-Oran front area, eastern Alboran Sea. *Deep-Sea Research I*, **49**: 83–99.
- HILBISH, T.J., LIMA, F.P., BRANNOCK, P.M., FLY, E.K., ROGNSTAD, R.L. & WETHEY, D.S. 2012. Change and stasis in marine hybrid zones in response to climate warming. *Journal of Biogeography*, **39**: 676–687.
- HILBISH, T.J., MULLINAX, A., DOLVEN, S.I., MEYER, A., KOEHN, R.K. & RAWSON, P.D. 2000. Origin of the antitropical distribution pattern in marine mussels (*Mytilus* spp.): routes and timing of transequatorial migration. *Marine Biology*, **136**: 69–77.
- HOPKINS, G.A. & FORREST, B.M. 2008. Management options for vessel hull fouling: an overview of risks posed by in-water cleaning. *ICES Journal of Marine Science*, **65**: 811–815.
- INOUE, K., WAITE, J.H., MATSUOKA, M., ODO, S. & HARAYAMA, S. 1995. Interspecific variations in adhesive protein sequences of *Mytilus edulis*, *M. galloprovincialis* and *M. trossulus*. *Biological Bulletin*, **189**: 370–375.
- JANEIRO, J., MARTINS, F. & RELVAS, P. 2012. Towards the development of an operational tool for oil spills management in the Algarve coast. *Journal of Coastal Conservation*, **16**: 449–460.
- JOHNSON, S.B., WARÉN, A. & VRIJENHOEK, R.C. 2008. DNA barcoding of *Lepetodrilus* limpets reveals cryptic species. *Journal of Shellfish Research*, **27**: 43–51.
- JONES, S.J., LIMA, F.P. & WETHEY, D.S. 2010. Rising environmental temperatures and biogeography: poleward range contraction of the blue mussel, *Mytilus edulis* L., in the western Atlantic. *Journal of Biogeography*, **37**: 2243–2259.
- KADARUSMAN, HUBERT, N., HADIARY, R.K., SUDARTO, PARADIS, E. & POUYAUD, L. 2012. Cryptic diversity in Indo-Australian rainbowfishes revealed by DNA barcoding: implications for conservation in a biodiversity hotspot candidate. *PLoS ONE*, **7**: e40627.
- KIJEWski, T., ŚMIETANKA, B., ZBAWICKA, M., GOSLING, E., HUMMEL, H. & WENNE, R. 2011. Distribution of *Mytilus* taxa in European coastal areas as inferred from molecular markers. *Journal of Sea Research*, **65**: 224–234.
- KNOLL, M., HENÁNDEZ-GUERRA, A., LENZ, B., LAATZEN, F.L., MACHÍN, F., MÜLLER, T.J. & SIEDLER, G. 2002. The eastern boundary current system between the Canary Islands and the African Coast. *Deep-Sea Research II*, **49**: 3427–3440.
- KOEHN, R.K. 1991. The genetics and taxonomy of species in the genus *Mytilus*. *Aquaculture*, **94**: 125–145.
- LEE, T. & ÓFOIGHIL, D. 2004. Hidden Floridian biodiversity: mitochondrial and nuclear gene trees reveal four cryptic species within the scorched mussel, *Brachidontes exustus*, species complex. *Molecular Ecology*, **13**: 3527–3542.
- LIMA, F.P., RIBEIRO, P.A., QUEIROZ, N., HAWKINS, S.J. & SANTOS, A.M. 2007. Do distributional shifts of northern and southern species of algae match the warming pattern? *Global Change Biology*, **13**: 2592–2604.
- LOURENÇO, C.R. 2012. *First record of the intertidal mussel Perna perna along the European coast: long overlooked or a recent range expansion?* MSc thesis, University of Algarve.
- MARTINS, C.S. 2002. Surface circulation in the eastern North Atlantic, from drifters and altimetry. *Journal of Geophysical Research*, **107**: doi:10.1029/2000JC000345.

- McDONALD, J.H., SEED, R. & KOEHN, R.K. 1991. Allozymes and morphometric characters of three species of *Mytilus* in the Northern and Southern Hemispheres. *Marine Biology*, **111**: 323–333.
- NICASTRO, K.R., ZARDI, G.I., McQUAID, C.D., PEARSON, G.A. & SERRÃO, E.A. 2012. Love thy neighbour: group properties of gaping behaviour in mussel aggregations. *PLoS ONE*, **7**: e47382.
- NICASTRO, K.R., ZARDI, G.I., McQUAID, C.D., TESKE, P.R. & BARKER, N.P. 2008. Coastal topography drives genetic structure in marine mussels. *Marine Ecology Progress Series*, **368**: 189–195.
- NICASTRO, K.R., ZARDI, G.I., TEIXEIRA, S., NEIVA, J., SERRÃO, E.A. & PEARSON, G.A. 2013. Shift happens: trailing edge contraction associated with recent warming trends threatens a distinct genetic lineage in the marine macroalga *Fucus vesiculosus*. *BMC Biology*, **11**: 6.
- OUAGAJJOU, Y. & PRESA, P. 2015. The connectivity of *Mytilus galloprovincialis* in northern Morocco: a gene flow crossroads between continents. *Estuarine, Coastal and Shelf Science*, **152**: 1–10.
- PAABY, A.B. & ROCKMAN, M.V. 2014. Cryptic genetic variation: evolution's hidden substrate. *Nature Reviews Genetics*, **15**: 247–258.
- PALUMBI, S.R. 1996. Nucleic acids II: the polymerase chain reaction. In: *Molecular systematics* (D. Hillis, C. Moritz & B. Mable, eds), pp. 205–247. Sinauer Associates, USA.
- PARMESAN, C. 2006. Ecological and evolutionary responses to recent climate change. *Annual Review of Ecology, Evolution, and Systematics*, **37**: 637–669.
- PATARNELLO, T., VOLCKAERT, F.A. & CASTILHO, R. 2007. Pillars of Hercules: is the Atlantic-Mediterranean transition a phylogeographical break? *Molecular Ecology*, **16**: 4426–4444.
- PFENNIG, D.W., RICE, A.M. & MARTIN, R.A. 2007. Field and experimental evidence for competition's role in phenotypic divergence. *Evolution*, **61**: 257–271.
- PLAZZI, F., CEREGATO, A., TAVIANI, M. & PASSAMONTI, M. 2011. A molecular phylogeny of bivalve mollusks: ancient radiations and divergences as revealed by mitochondrial genes. *PLoS ONE*, **6**: e27147.
- PLAZZI, F. & PASSAMONTI, M. 2010. Towards a molecular phylogeny of mollusks: bivalves' early evolution as revealed by mitochondrial genes. *Molecular Phylogenetics and Evolution*, **57**: 641–657.
- POSADA, D. 2004. Collapse 1.2. <http://darwin.uvigo.es> (accessed 1 June 2012).
- POSADA, D. 2008. jModelTest: phylogenetic model averaging. *Molecular Biology and Evolution*, **25**: 1253–1256.
- QUESADA, H., BEYNON, C.M. & SKIBINSKI, D.O. 1995a. A mitochondrial DNA discontinuity in the mussel *Mytilus galloprovincialis* Lmk: Pleistocene vicariance biogeography and secondary intergradation. *Molecular Biology and Evolution*, **12**: 521–524.
- QUESADA, H., WENNE, R. & SKIBINSKI, D.O. 1995b. Differential introgression of mitochondrial DNA across species boundaries within the marine mussel genus *Mytilus*. *Proceeding of the Royal Society of London, Series B*, **262**: 51–56.
- QUESADA, H., ZAPATA, C. & ALVAREZ, G. 1995c. A multilocus allozyme discontinuity in the mussel *Mytilus galloprovincialis*: the interaction of ecological and life-history factors. *Marine Ecology Progress Series*, **116**: 99–115.
- QUINTEIRO, J., RODRÍGUEZ-CASTRO, J. & REY-MÉNDEZ, M. 2007. Population genetic structure of the stalked barnacle *Pollicipes pollicipes* (Gmelin, 1789) in the northeastern Atlantic: influence of coastal currents and mesoscale hydrographic structures. *Marine Biology*, **153**: 47–60.
- RAWSON, P.D. & HILBISH, T.J. 1995. Evolutionary relationships among the male and female mitochondrial DNA lineages in the *Mytilus edulis* species complex. *Molecular Biology and Evolution*, **12**: 893–901.
- RONQUIST, F., TESLENKO, M., VAN DER MARK, P., AYRES, D.L., DARLING, A., HOHNA, S., LARGET, B., LIU, L., SUCHARD, M.A. & HUELSENBECK, J.P. 2012. MrBayes 3.2: efficient Bayesian phylogenetic inference and model choice across a large model space. *Systematic Biology*, **61**: 539–542.
- RUIZ, G.M., CARLTON, J.T., GROSHOLZ, E.D. & HINES, A.H. 1997. Global invasions of marine and estuarine habitats by nonindigenous species: mechanisms, extent, and consequences. *American Zoology*, **37**: 621–632.
- SÁ-PINTO, A., BRANCO, M.S., ALEXANDRINO, P.B., FONTAINE, M.C. & BAIRD, S.J.E. 2012. Barriers to gene flow in the marine environment: insights from two common intertidal limpet species of the Atlantic and Mediterranean. *PLoS ONE*, **7**: e50330.
- SAMBROOK, J., FRITSEH, E.F. & MANIATIS, T. 1989. *Molecular cloning. A laboratory manual*. Cold Spring Harbor Laboratory Press, Cold Spring Harbor, NY.
- SANJUAN, A., COMESAÑA, A.S. & DE CARLOS, A. 1996. Macrogeographic differentiation by mtDNA restriction site analysis in the S.W. European *Mytilus galloprovincialis* Lmk. *Journal of Experimental Marine Biology and Ecology*, **198**: 89–100.
- SANJUAN, A., ZAPATA, C. & ALVAREZ, G. 1994. *Mytilus galloprovincialis* and *M. edulis* on the coasts of the Iberian Peninsula. *Marine Ecology Progress Series*, **113**: 131–146.
- SCHNEIDER, K.R., WETHEY, D.S., HELMUTH, B.S.T. & HILBISH, T.J. 2005. Implications of movement behavior on mussel dislodgement: exogenous selection in a *Mytilus* spp. hybrid zone. *Marine Biology*, **146**: 333–343.
- SKIBINSKI, D.O., GALLAGHER, C. & BEYNON, C.M. 1994. Mitochondrial DNA inheritance. *Nature*, **368**: 817–818.
- ŚMIETANKA, B., BURZYŃSKI, A. & WENNE, R. 2010. Comparative genomics of marine mussels (*Mytilus* spp.) gender associated mtDNA: rapidly evolving atp8. *Journal of Molecular Evolution*, **71**: 385–400.
- ŚMIETANKA, B., ZBAWICKA, M., SANKO, T., WENNE, R. & BURZYŃSKI, A. 2013. Molecular population genetics of male and female mitochondrial genomes in subarctic *Mytilus trossulus*. *Marine Biology*, **160**: 1709–1721.
- SOUTHWARD, A.J., HAWKINS, S.J. & BURROWS, M.T. 1995. Seventy years' observations of changes in distribution and abundance of zooplankton and intertidal organisms in the western English Channel in relation to rising sea temperature. *Journal of Thermal Biology*, **20**: 127–155.
- STUCKAS, H., STOOF, K., QUESADA, H. & TIEDEMANN, R. 2009. Evolutionary implications of discordant clines across the Baltic *Mytilus* hybrid zone (*Mytilus edulis* and *Mytilus trossulus*). *Heredity*, **103**: 146–156.
- TINTORE, J., LA VIOLETTE, P.E., BLADE, I. & CRUZADO, A. 1988. A study of an intense density front in the Eastern Alboran Sea: the Almeria-Oran Front. *Journal of Physical Oceanography*, **18**: 1384–1397.
- TORO, J.E., THOMPSON, R.J. & INNES, D.J. 2002. Reproductive isolation and reproductive output in two sympatric mussel species (*Mytilus edulis*, *M. trossulus*) and their hybrids from Newfoundland. *Marine Biology*, **141**: 897–909.
- VÄINÖLÄ, R. 1991. Genetic divergence and a hybrid zone between Baltic and North Sea *Mytilus* populations (Mytilidae: Mollusca). *Biological Journal of the Linnean Society*, **43**: 127–148.
- VÄINÖLÄ, R. & STRELKOV, P. 2011. *Mytilus trossulus* in Northern Europe. *Marine Biology*, **158**: 817–833.
- WESTFALL, K.M. & GARDNER, J.P. 2010. Genetic diversity of Southern Hemisphere blue mussels (Bivalvia: Mytilidae) and the identification of non-indigenous taxa. *Biological Journal of the Linnean Society*, **101**: 898–909.
- WESTFALL, K.M. & GARDNER, J.P.A. 2013. Interlineage *Mytilus galloprovincialis* Lmk. 1819 hybridization yields inconsistent genetic outcomes in the Southern Hemisphere. *Biological Invasions*, **15**: 1493–1506.
- WESTFALL, K.M., WIMBERGER, P.H. & GARDNER, J.P. 2010. An RFLP assay to determine if *Mytilus galloprovincialis* Lmk. (Mytilidae: Bivalvia) is of Northern or Southern Hemisphere origin. *Molecular Ecology Resources*, **10**: 573–575.
- WILLIS, G.L. & SKIBINSKI, D.O. 1992. Variation in strength of attachment to the substrate explains differential mortality in hybrid mussel (*Mytilus galloprovincialis* and *M. edulis*) populations. *Marine Biology*, **112**: 403–408.



- WONHAM, M.J. 2004. Mini-review: distribution of the Mediterranean mussel *Mytilus galloprovincialis* (Bivalvia: Mytilidae) and hybrids in the Northeast Pacific. *Journal of Shellfish Research*, **23**: 535–543.
- ZARDI, G., NICASTRO, K., McQUAID, C., RIUS, M. & PORRI, F. 2006. Hydrodynamic stress as a determinant factor in habitat segregation between the indigenous mussel *Perna perna* and the invasive *Mytilus galloprovincialis* in South Africa. *Marine Biology*, **150**: 79–88.
- ZARDI, G.I., NICASTRO, K.R., CANOVAS, F., FERREIRA COSTA, J., SERRÃO, E.A. & PEARSON, G.A. 2011a. Adaptive traits are maintained on steep selective gradients despite gene flow and hybridization in the intertidal zone. *PLoS ONE*, **6**: e19402.
- ZARDI, G.I., NICASTRO, K.R., McQUAID, C.D. & ERLANDSSON, J. 2008. Sand and wave induced mortality in invasive (*Mytilus galloprovincialis*) and indigenous (*Perna perna*) mussels. *Marine Biology*, **153**: 853–858.
- ZARDI, G.I., NICASTRO, K.R., McQUAID, C.D., HANCKE, L. & HELMUTH, B. 2011b. The combination of selection and dispersal helps explain genetic structure in intertidal mussels. *Oecologia*, **165**: 947–958.
- ZOUROS, E., BALL, A.O., SAAVEDRA, C. & FREEMAN, K.R. 1994. An unusual type of mitochondrial DNA inheritance in the blue mussel *Mytilus*. *Proceedings of the National Academy of Sciences of the USA*, **91**: 7463–7467.
